# Supplementary material
Source: MDPI journal article supplement (https://www.mdpi.com/2227-7102/12/2/141)
Supplement: s1 [file s1]

## Supplementary materials

### An Integrative Literature Review of University-based Early Childhood Education and Care Centres within Early Childhood Teacher Education Settings

**Table S1:** Supplementary material concerning results of the research question 2 (see Table 2 and Table 3).

| No.                                                                                                         | Centre name (centres are organised by affiliation)                      | Public or private host university | Structure of ECEC (includes educational and caring aspects)                                                        | Theoretical framework or curriculum of ECEC                                                               |
|-------------------------------------------------------------------------------------------------------------|-------------------------------------------------------------------------|-----------------------------------|--------------------------------------------------------------------------------------------------------------------|-----------------------------------------------------------------------------------------------------------|
| <i>Affiliated with the university but no more details were available regarding the affiliation (n = 10)</i> |                                                                         |                                   |                                                                                                                    |                                                                                                           |
| 1.                                                                                                          | Karen Slattery Educational Research Center for Child Development [57]   | Public                            | ECEC for children aged from 3 months to 5 years.                                                                   | Inclusive                                                                                                 |
| 2.                                                                                                          | Child development laboratory school <sup>1</sup> [59]                   | Private                           | ECEC for preschool-aged children.                                                                                  | Child-centred, DAP <sup>3</sup>                                                                           |
| 3.                                                                                                          | The campus laboratory school child development center <sup>1</sup> [23] | Public                            | ECEC for 56 infants, toddlers, and preschool-aged children.                                                        | DAP <sup>3</sup>                                                                                          |
| 4.                                                                                                          | Harold E. Jones Child Study Center [61]                                 | Public                            | Full-day ECEC for young children.                                                                                  | Influenced by Montessori, Head Start, High/Scope, Bank Street, British Infant School.                     |
| 5.                                                                                                          | GMU Child Development Center [40]                                       | Public                            | Full-day ECEC for 125 children aged 2–4 years. Summer programmes for children aged 5–8 years, Al's Pals programme. | Learning by playing                                                                                       |
| 6.                                                                                                          | Botanical Garden Room <sup>1</sup> [24]                                 | -                                 | ECEC group room offers full-day and half-day ECEC for 8 infants aged approx. 10–20 months. <sup>5</sup>            | -                                                                                                         |
| 7.                                                                                                          | Experimental Greenhouse Room <sup>1</sup> [24]                          | -                                 | ECEC group room offers full-day ECEC for 8 infants aged approx. 3–14 months. <sup>5</sup>                          | -                                                                                                         |
| 8.                                                                                                          | Wildflower Valley Room <sup>1</sup> [24]                                | -                                 | ECEC group room offers full-day and half-day ECEC for 8 infants aged approx. 6.5–15 months. <sup>5</sup>           | -                                                                                                         |
| 9.                                                                                                          | Harold E. Jones Child Study Center [66]                                 | -                                 | Full-day ECEC for 50 preschool-aged children.                                                                      | Research-based, constructivism, social constructivism, learning by doing, psychosocial development theory |
| 10.                                                                                                         | Virginia Tech Child Development Lab School [35]                         | Public                            | Half-day ECEC for 88 children aged from infancy to 5 years.                                                        | Social constructivism, Reggio Emilia, learning by playing                                                 |
| <i>Affiliated with an educational or developmental institution that operates within university (n = 20)</i> |                                                                         |                                   |                                                                                                                    |                                                                                                           |
| 11.                                                                                                         | Hashemite University nursery [55]                                       | -                                 | ECEC for children aged under 4 years.                                                                              | -                                                                                                         |

|     |                                                        |        |                                                                                                                                                        |                                                                                                                                                                           |
|-----|--------------------------------------------------------|--------|--------------------------------------------------------------------------------------------------------------------------------------------------------|---------------------------------------------------------------------------------------------------------------------------------------------------------------------------|
| 12. | Merrill-Palmer Institute, laboratory programme [43]    | Public | ECEC                                                                                                                                                   | -                                                                                                                                                                         |
| 13. | Kent State Child Development Center [56]               | Public | Full-day ECEC for toddlers, preschool and kindergarten-aged children. Also primary programmes.                                                         | Reggio Emilia inspired                                                                                                                                                    |
| 14. | Child Development Laboratory [15]                      | Public | Full-day ECEC for infant, toddler, and preschool-aged children of 192 families. Open ECEC activities for infants and their parents.                    | -                                                                                                                                                                         |
| 15. | USC/Gateway Child Development and Research Center [18] | Public | ECEC services were planned for approx. 200 children.                                                                                                   | -                                                                                                                                                                         |
| 16. | Child Study Centre <sup>2</sup> [58]                   | Public | ECEC and summer programmes for children aged from 2 years to kindergarten.                                                                             | -                                                                                                                                                                         |
| 17. | Kent State University Laboratory School [36]           | Public | ECEC for 145 children aged 1.5–6 years.                                                                                                                | Reggio Emilia inspired school of inquiry                                                                                                                                  |
| 18. | South Dakota State University Laboratory School [36]   | Public | ECEC for 116 children aged 15 months to 6 years.                                                                                                       | Reggio Emilia inspired school of inquiry                                                                                                                                  |
| 19. | Laboratory school <sup>1</sup> [60]                    | Public | ECEC for 117 children aged 15 months to 6 years.                                                                                                       | Reggio Emilia inspired, inquiry-based practices.<br>DAP <sup>3</sup>                                                                                                      |
| 20. | URI Child Development Center [62]                      | Public | Full-day ECEC for 34–40 children aged 3–6 years.                                                                                                       | DAP <sup>3</sup>                                                                                                                                                          |
| 21. | Dr. Pat Feinstein Child Development Center [62]        | Public | Full-day ECEC for 34–40 children aged 3–6 years.                                                                                                       | DAP <sup>3</sup>                                                                                                                                                          |
| 22. | Early Childhood Research Laboratory [63]               | -      | Open ECEC activities (three playgroups) for infants and their parents.                                                                                 | -                                                                                                                                                                         |
| 23. | University laboratory preschool <sup>1</sup> [3]       | -      | Half-day ECEC for 50 children aged 2–4 years.                                                                                                          | Constructivism, social constructivism, social learning theory                                                                                                             |
| 24. | Laboratory preschool <sup>1</sup> [64]                 | -      | Half-day ECEC for 50 children aged 2–4 years.                                                                                                          | Constructivism, social constructivism, social learning theory                                                                                                             |
| 25. | Myrna's Children's Village [32]                        | Public | Full-day and half-day ECEC for 164 children aged 0–5 years.                                                                                            | Depends on programmes.<br>Programmes: Dona Ana County Head Start, La Clinica de Familia Early Head Start, Las Cruces public school classrooms, School for Young Children. |
| 26. | Harriett Laboratory School [67]                        | Public | ECEC for 80 preschool-aged children. Programmes also for 84 children from kindergarten to sixth grade.                                                 | Child-focused, learning by exploring                                                                                                                                      |
| 27. | Malcolm Price Laboratory School [68]                   | Public | ECEC NK-students <sup>4</sup> , but also primary school programmes.                                                                                    | -                                                                                                                                                                         |
| 28. | Child development laboratory school <sup>1</sup> [69]  | Public | Full-day ECEC and summer workshops for preschool-aged children, Saturday programmes for toddlers. Collaborations with local autism school, Head Start, | -                                                                                                                                                                         |

|                                                    |                                                                     |         |                                                               |                                                                           |
|----------------------------------------------------|---------------------------------------------------------------------|---------|---------------------------------------------------------------|---------------------------------------------------------------------------|
|                                                    |                                                                     |         | and special needs school district programme.                  |                                                                           |
| 29.                                                | Child Development Center for Learning and Research [70]             | Public  | Full-day ECEC for 40 children aged from 15 months to 5 years. | Reggio Emilia, social constructivism                                      |
| 30.                                                | The SM Laboratory Preschool [71]                                    | -       | Half-day ECEC and summer program for children aged 3–5 years. | Reggio Emilia, constructivism, socio-cultural theory, emergent curriculum |
| <i>Affiliated with a medical school (n = 1)</i>    |                                                                     |         |                                                               |                                                                           |
| 31.                                                | Yale Child Study Center [43]                                        | Private | ECEC                                                          | -                                                                         |
| <i>Affiliated with a community college (n = 3)</i> |                                                                     |         |                                                               |                                                                           |
| 32.                                                | Child development center <sup>1</sup> [31]                          | -       | ECEC for children aged 1.5–5 years.                           | Child-centred, play-based, hands-on learning                              |
| 33.                                                | Wytheville Community College Child Development Center [40]          | -       | Full-day ECEC for 70 children aged from 2 months to 5 years.  | -                                                                         |
| 34.                                                | Housatonic Community College Early Childhood Laboratory School [65] | -       | ECEC                                                          | -                                                                         |

<sup>1</sup>Pseudonym or the type of centre, if the name was not mentioned in a publication;

<sup>2</sup>According to the publication, the model is not operating anymore;

<sup>3</sup>DAP = developmentally appropriate practices;

<sup>4</sup>According to the yearbook of Malcolm Price Laboratory School (Northern University High School, 2007), NK-students were described as pre-kindergarten and kindergarten-aged children;

<sup>5</sup>According to children's ages, the ECEC group includes also toddlers.

**Table S2:** Supplementary material concerning results of the research question 3 (see Table 4, Table 5 and Table 6).

| Academic mission                                                                                        | Academic activity    | Name of university ECEC centre                                                                                                                                                                                                                                                                                                                                                                                                                                                                                                                                                                                                                                                                                                                                                                                               |
|---------------------------------------------------------------------------------------------------------|----------------------|------------------------------------------------------------------------------------------------------------------------------------------------------------------------------------------------------------------------------------------------------------------------------------------------------------------------------------------------------------------------------------------------------------------------------------------------------------------------------------------------------------------------------------------------------------------------------------------------------------------------------------------------------------------------------------------------------------------------------------------------------------------------------------------------------------------------------|
| Educational collaboration between university ECEC centres and EC teacher education programmes (n = 134) | Observation (n = 25) | Child development center [31]<br>Child Development Center for Learning and Research [70]<br>Child Development Laboratory [15]<br>Child development laboratory school [59]<br>Child development laboratory school [69]<br>Child Study Centre [58]<br>Dr. Pat Feinstein Child Development Center [62]<br>Early Childhood Research Laboratory [63]<br>Experimental Greenhouse Room [24]<br>GMU Child Development Center [40]<br>Harold E. Jones Child Study Center [61]<br>Harold E. Jones Child Study Center [66]<br>Harriett Laboratory School [67]<br>Hashemite University nursery [55]<br>Karen Slattery Educational Research Center for Child Development [57]<br>Kent State Child Development Center [56]<br>Kent State University Laboratory School [36]<br>Laboratory preschool [64]<br>Myrna's Children's Village [32] |

---

|                                                                          |                                                                                                                                                                                                                                                                                                                                                                                                                                                                                                                                                                                                                                                                                                                                                                                                                                                                                                                                                                                        |
|--------------------------------------------------------------------------|----------------------------------------------------------------------------------------------------------------------------------------------------------------------------------------------------------------------------------------------------------------------------------------------------------------------------------------------------------------------------------------------------------------------------------------------------------------------------------------------------------------------------------------------------------------------------------------------------------------------------------------------------------------------------------------------------------------------------------------------------------------------------------------------------------------------------------------------------------------------------------------------------------------------------------------------------------------------------------------|
|                                                                          | The campus laboratory school child development center [23]<br>The SM Laboratory Preschool [71]<br>University laboratory preschool [3]<br>URI Child Development Center [62]<br>Virginia Tech Child Development Lab School [35]<br>Wytheville Community College Child Development Center [40]                                                                                                                                                                                                                                                                                                                                                                                                                                                                                                                                                                                                                                                                                            |
| Research<br>(conducted by<br>preservice<br>teachers)<br>( <i>n</i> = 23) | Botanical Garden Room [24]<br>Child development center [31]<br>Child Development Center for Learning and Research [70]<br>Child Development Laboratory [15]<br>Child development laboratory school [59]<br>Child development laboratory school [69]<br>Child Study Centre [58]<br>Dr. Pat Feinstein Child Development Center [62]<br>Early Childhood Research Laboratory [63]<br>Experimental Greenhouse Room [24]<br>Harold E. Jones Child Study Center [61]<br>Harold E. Jones Child Study Center [66]<br>Harriett Laboratory School [67]<br>Kent State Child Development Center [56]<br>Kent State University Laboratory School [36]<br>Laboratory preschool [64]<br>Laboratory school [60]<br>Myrna's Children's Village [32]<br>South Dakota State University Laboratory School [36]<br>The campus laboratory school child development center [23]<br>University laboratory preschool [3]<br>URI Child Development Center [62]<br>Virginia Tech Child Development Lab School [35] |
| Course<br>assignments<br>or projects<br>( <i>n</i> = 18)                 | Botanical Garden Room [24]<br>Child development center [31]<br>Child Development Center for Learning and Research [70]<br>Child Development Laboratory [15]<br>Child development laboratory school [59]<br>Dr. Pat Feinstein Child Development Center [62]<br>Early Childhood Research Laboratory [63]<br>GMU Child Development Center [40]<br>Harriett Laboratory School [67]<br>Karen Slattery Educational Research Center for Child Development [57]<br>Kent State Child Development Center [56]<br>Laboratory preschool [64]<br>Laboratory school [60]<br>The campus laboratory school child development center [23]<br>University laboratory preschool [3]<br>URI Child Development Center [62]<br>Virginia Tech Child Development Lab School [35]<br>Wytheville Community College Child Development Center [40]                                                                                                                                                                  |
| Preservice<br>teaching<br>( <i>n</i> = 17)                               | Child development center [31]<br>Child Development Center for Learning and Research [70]<br>Child Development Laboratory [15]<br>Child development laboratory school [59]<br>Child development laboratory school [69]<br>Experimental Greenhouse Room [24]<br>Harold E. Jones Child Study Center [61]<br>Harold E. Jones Child Study Center [66]<br>Harriett Laboratory School [67]<br>Kent State Child Development Center [56]<br>Laboratory school [60]<br>South Dakota State University Laboratory School [36]<br>The campus laboratory school child development center [23]                                                                                                                                                                                                                                                                                                                                                                                                        |

---

|                                                                    |                                                                  |                                                                       |
|--------------------------------------------------------------------|------------------------------------------------------------------|-----------------------------------------------------------------------|
|                                                                    | Practicum<br>(n = 12)                                            | The SM Laboratory Preschool [71]                                      |
|                                                                    |                                                                  | University laboratory preschool [3]                                   |
|                                                                    |                                                                  | Virginia Tech Child Development Lab School [35]                       |
|                                                                    |                                                                  | Wildflower Valley Room [24]                                           |
|                                                                    |                                                                  | Botanical Garden Room [24]                                            |
|                                                                    |                                                                  | Child development center [31]                                         |
|                                                                    |                                                                  | Child Development Laboratory [15]                                     |
|                                                                    |                                                                  | Child development laboratory school [69]                              |
|                                                                    | Internship<br>(n = 11)                                           | Dr. Pat Feinstein Child Development Center [62]                       |
|                                                                    |                                                                  | Early Childhood Research Laboratory [63]                              |
|                                                                    |                                                                  | Harold E. Jones Child Study Center [61]                               |
|                                                                    |                                                                  | Harriett Laboratory School [67]                                       |
|                                                                    |                                                                  | Laboratory school [60]                                                |
|                                                                    |                                                                  | Myrna's Children's Village [32]                                       |
|                                                                    |                                                                  | URI Child Development Center [62]                                     |
|                                                                    |                                                                  | Virginia Tech Child Development Lab School [35]                       |
|                                                                    | Other types of<br>training (n = 8)                               | Child Development Center for Learning and Research [70]               |
|                                                                    |                                                                  | Child Development Laboratory [15]                                     |
|                                                                    |                                                                  | Child development laboratory school [59]                              |
|                                                                    |                                                                  | Child development laboratory school [69]                              |
|                                                                    |                                                                  | Dr. Pat Feinstein Child Development Center [62]                       |
|                                                                    |                                                                  | Kent State University Laboratory School [36]                          |
|                                                                    |                                                                  | Laboratory preschool [64]                                             |
|                                                                    |                                                                  | Myrna's Children's Village [32]                                       |
|                                                                    | Giving<br>lectures and<br>presentations<br>(n = 10)              | University laboratory preschool [3]                                   |
|                                                                    |                                                                  | URI Child Development Center [62]                                     |
|                                                                    |                                                                  | Virginia Tech Child Development Lab School [35]                       |
|                                                                    |                                                                  | Child development laboratory school [59]                              |
|                                                                    |                                                                  | Child Study Centre [58]                                               |
|                                                                    |                                                                  | Hashemite University nursery [55]                                     |
|                                                                    |                                                                  | Karen Slattery Educational Research Center for Child Development [57] |
|                                                                    |                                                                  | Kent State University Laboratory School [36]                          |
|                                                                    | Participating in<br>reportage and<br>evaluation<br>(n = 7)       | Laboratory preschool [64]                                             |
|                                                                    |                                                                  | Malcolm Price Laboratory School [68]                                  |
|                                                                    |                                                                  | Wytheville Community College Child Development Center [40]            |
|                                                                    |                                                                  | Child development center [31]                                         |
|                                                                    |                                                                  | Child Development Center for Learning and Research [70]               |
|                                                                    |                                                                  | Child Development Laboratory [15]                                     |
|                                                                    |                                                                  | Child development laboratory school [59]                              |
|                                                                    |                                                                  | Child development laboratory school [69]                              |
|                                                                    | Organising<br>events (n = 3)                                     | Child Study Centre [58]                                               |
|                                                                    |                                                                  | Laboratory school [60]                                                |
|                                                                    |                                                                  | The SM Laboratory Preschool [71]                                      |
|                                                                    |                                                                  | University laboratory preschool [3]                                   |
|                                                                    |                                                                  | URI Child Development Center [62]                                     |
|                                                                    |                                                                  | Botanical Garden Room [24]                                            |
|                                                                    |                                                                  | Child development center [31]                                         |
|                                                                    |                                                                  | Child Development Center for Learning and Research [70]               |
| Research<br>collaboration<br>between<br>university<br>ECEC centres | Facilitate<br>research<br>conducted by<br>preservice<br>teachers | Child development laboratory school [59]                              |
|                                                                    |                                                                  | Laboratory preschool [64]                                             |
|                                                                    |                                                                  | Myrna's Children's Village [32]                                       |
|                                                                    |                                                                  | The campus laboratory school child development center [23]            |
|                                                                    |                                                                  | Early Childhood Research Laboratory [63]                              |
|                                                                    |                                                                  | Malcolm Price Laboratory School [68]                                  |
|                                                                    |                                                                  | Wildflower Valley Room [24]                                           |
|                                                                    |                                                                  | Botanical Garden Room [24]                                            |
|                                                                    |                                                                  | Child development center [31]                                         |
|                                                                    |                                                                  | Child Development Center for Learning and Research [70]               |
|                                                                    |                                                                  | Child Development Laboratory [15]                                     |
|                                                                    |                                                                  | Child development laboratory school [59]                              |

|                              |                                                              |                                                                                                                                                                                                                                                                                                                                                                                                                                                                                                                                                                                                                                                                                                                                                                                                                                                                                                         |
|------------------------------|--------------------------------------------------------------|---------------------------------------------------------------------------------------------------------------------------------------------------------------------------------------------------------------------------------------------------------------------------------------------------------------------------------------------------------------------------------------------------------------------------------------------------------------------------------------------------------------------------------------------------------------------------------------------------------------------------------------------------------------------------------------------------------------------------------------------------------------------------------------------------------------------------------------------------------------------------------------------------------|
| and universities<br>(n = 98) | (n = 23)                                                     | Child development laboratory school [69]<br>Child Study Centre [58]<br>Dr. Pat Feinstein Child Development Center [62]<br>Early Childhood Research Laboratory [63]<br>Experimental Greenhouse Room [24]<br>Harold E. Jones Child Study Center [61]<br>Harold E. Jones Child Study Center [66]<br>Harriett Laboratory School [67]<br>Kent State Child Development Center [56]<br>Kent State University Laboratory School [36]<br>Laboratory preschool [64]<br>Laboratory school [60]<br>Myrna's Children's Village [32]<br>South Dakota State University Laboratory School [36]<br>The campus laboratory school child development center [23]<br>University laboratory preschool [3]<br>URI Child Development Center [62]<br>Virginia Tech Child Development Lab School [35]                                                                                                                             |
|                              | Facilitate research conducted by faculty members<br>(n = 21) | Botanical Garden Room [24]<br>Child development center [31]<br>Child Development Center for Learning and Research [70]<br>Child Development Laboratory [15]<br>Child development laboratory school [59]<br>Child development laboratory school [69]<br>Child Study Centre [58]<br>Dr. Pat Feinstein Child Development Center [62]<br>Experimental Greenhouse Room [24]<br>Harold E. Jones Child Study Center [61]<br>Harriett Laboratory School [67]<br>Karen Slattery Educational Research Center for Child Development [57]<br>Kent State University Laboratory School [36]<br>Laboratory preschool [64]<br>Myrna's Children's Village [32]<br>South Dakota State University Laboratory School [36]<br>The SM Laboratory Preschool [71]<br>University laboratory preschool [3]<br>URI Child Development Center [62]<br>Virginia Tech Child Development Lab School [35]<br>Wildflower Valley Room [24] |
|                              | Facilitate multidisciplinary research<br>(n = 11)            | Child development center [31]<br>Child Development Center for Learning and Research [70]<br>Child Development Laboratory [15]<br>Child development laboratory school [69]<br>Child Study Centre [58]<br>GMU Child Development Center [40]<br>Harold E. Jones Child Study Center [61]<br>Karen Slattery Educational Research Center for Child Development [57]<br>Kent State University Laboratory School [36]<br>South Dakota State University Laboratory School [36]<br>University laboratory preschool [3]                                                                                                                                                                                                                                                                                                                                                                                            |
|                              | Directors as researchers<br>(n = 14)                         | Child development center [31]<br>Child Development Center for Learning and Research [70]<br>Child Development Laboratory [15]<br>Child development laboratory school [69]<br>Early Childhood Research Laboratory [63]<br>Harriett Laboratory School [67]<br>Kent State Child Development Center [56]<br>Kent State University Laboratory School [36]                                                                                                                                                                                                                                                                                                                                                                                                                                                                                                                                                    |

|                                                                                     |                                                                       |                                                         |
|-------------------------------------------------------------------------------------|-----------------------------------------------------------------------|---------------------------------------------------------|
|                                                                                     |                                                                       | Laboratory preschool [64]                               |
|                                                                                     |                                                                       | Laboratory school [60]                                  |
|                                                                                     |                                                                       | South Dakota State University Laboratory School [36]    |
|                                                                                     |                                                                       | University laboratory preschool [3]                     |
|                                                                                     |                                                                       | USC/Gateway Child Development and Research Center [18]  |
|                                                                                     |                                                                       | Virginia Tech Child Development Lab School [35]         |
| Teachers as<br>researchers<br>(n = 10)                                              |                                                                       | Child Development Center for Learning and Research [70] |
|                                                                                     |                                                                       | Early Childhood Research Laboratory [63]                |
|                                                                                     |                                                                       | Harold E. Jones Child Study Center [66]                 |
|                                                                                     |                                                                       | Kent State Child Development Center [56]                |
|                                                                                     |                                                                       | Kent State University Laboratory School [36]            |
|                                                                                     |                                                                       | Laboratory school [60]                                  |
|                                                                                     |                                                                       | Malcolm Price Laboratory School [68]                    |
|                                                                                     |                                                                       | South Dakota State University Laboratory School [36]    |
|                                                                                     |                                                                       | University laboratory preschool [3]                     |
|                                                                                     |                                                                       | Virginia Tech Child Development Lab School [35]         |
| University-based<br>ECEC centre as<br>applicator of<br>research results<br>(n = 19) |                                                                       | Botanical Garden Room [24]                              |
|                                                                                     |                                                                       | Child development center [31]                           |
|                                                                                     |                                                                       | Child Development Center for Learning and Research [70] |
|                                                                                     |                                                                       | Child Development Laboratory [15]                       |
|                                                                                     |                                                                       | Child development laboratory school [59]                |
|                                                                                     |                                                                       | Dr. Pat Feinstein Child Development Center [62]         |
|                                                                                     |                                                                       | Early Childhood Research Laboratory [63]                |
|                                                                                     |                                                                       | Harold E. Jones Child Study Center [66]                 |
|                                                                                     |                                                                       | Harriett Laboratory School [67]                         |
|                                                                                     |                                                                       | Kent State Child Development Center [56]                |
|                                                                                     |                                                                       | Kent State University Laboratory School [36]            |
|                                                                                     |                                                                       | Laboratory preschool [64]                               |
|                                                                                     |                                                                       | Laboratory school [60]                                  |
|                                                                                     |                                                                       | Myrna's Children's Village [32]                         |
|                                                                                     |                                                                       | South Dakota State University Laboratory School [36]    |
|                                                                                     |                                                                       | The SM Laboratory Preschool [71]                        |
|                                                                                     |                                                                       | University laboratory preschool [3]                     |
|                                                                                     |                                                                       | URI Child Development Center [62]                       |
|                                                                                     |                                                                       | Virginia Tech Child Development Lab School [35]         |
| Outreach<br>activities of<br>university<br>ECEC centres<br>(n = 209)                | Sharing<br>information<br>about university<br>ECEC centre<br>(n = 23) | Child development center [31]                           |
|                                                                                     |                                                                       | Child Development Center for Learning and Research [70] |
|                                                                                     |                                                                       | Child Development Laboratory [15]                       |
|                                                                                     |                                                                       | Child development laboratory school [59]                |
|                                                                                     |                                                                       | Child development laboratory school [69]                |
|                                                                                     |                                                                       | Child Study Centre [58]                                 |
|                                                                                     |                                                                       | Dr. Pat Feinstein Child Development Center [62]         |
|                                                                                     |                                                                       | Early Childhood Research Laboratory [63]                |
|                                                                                     |                                                                       | Experimental Greenhouse Room [24]                       |
|                                                                                     |                                                                       | Harold E. Jones Child Study Center [66]                 |
|                                                                                     |                                                                       | Harriett Laboratory School [67]                         |
|                                                                                     |                                                                       | Kent State Child Development Center [56]                |
|                                                                                     |                                                                       | Laboratory school [60]                                  |
|                                                                                     |                                                                       | Malcolm Price Laboratory School [68]                    |
|                                                                                     |                                                                       | Merrill-Palmer Institute, laboratory programme [43]     |
|                                                                                     |                                                                       | Myrna's Children's Village [32]                         |
|                                                                                     |                                                                       | South Dakota State University Laboratory School [36]    |
|                                                                                     |                                                                       | The SM Laboratory Preschool [71]                        |
|                                                                                     |                                                                       | University laboratory preschool [3]                     |
|                                                                                     |                                                                       | URI Child Development Center [62]                       |
|                                                                                     |                                                                       | USC/Gateway Child Development and Research Center [18]  |
|                                                                                     |                                                                       | Virginia Tech Child Development Lab School [35]         |
|                                                                                     |                                                                       | Wildflower Valley Room [24]                             |

---

|                                                                 |                                                                                                                                                                                                                                                                                                                                                                                                                                                                                                                                                                                                                                                                                                                                                                                                                                                                                                                                                                                                                                                                       |
|-----------------------------------------------------------------|-----------------------------------------------------------------------------------------------------------------------------------------------------------------------------------------------------------------------------------------------------------------------------------------------------------------------------------------------------------------------------------------------------------------------------------------------------------------------------------------------------------------------------------------------------------------------------------------------------------------------------------------------------------------------------------------------------------------------------------------------------------------------------------------------------------------------------------------------------------------------------------------------------------------------------------------------------------------------------------------------------------------------------------------------------------------------|
| Writing<br>scholarly<br>publications<br>( <i>n</i> = 20)        | Child development center [31]<br>Child Development Center for Learning and Research [70]<br>Child Development Laboratory [15]<br>Child development laboratory school [69]<br>Child Study Centre [58]<br>Dr. Pat Feinstein Child Development Center [62]<br>Early Childhood Research Laboratory [63]<br>Harold E. Jones Child Study Center [66]<br>Harriett Laboratory School [67]<br>Kent State Child Development Center [56]<br>Kent State University Laboratory School [36]<br>Laboratory preschool [64]<br>Laboratory school [60]<br>Malcolm Price Laboratory School [68]<br>Merrill-Palmer Institute, laboratory programme [43]<br>South Dakota State University Laboratory School [36]<br>University laboratory preschool [3]<br>URI Child Development Center [62]<br>USC/Gateway Child Development and Research Center [18]<br>Virginia Tech Child Development Lab School [35]                                                                                                                                                                                  |
| Giving<br>conference<br>presentations<br>( <i>n</i> = 13)       | Child development center [31]<br>Child Development Center for Learning and Research [70]<br>Child Development Laboratory [15]<br>Child development laboratory school [69]<br>Dr. Pat Feinstein Child Development Center [62]<br>Early Childhood Research Laboratory [63]<br>Harriett Laboratory School [67]<br>Kent State Child Development Center [56]<br>Kent State University Laboratory School [36]<br>Malcolm Price Laboratory School [68]<br>South Dakota State University Laboratory School [36]<br>URI Child Development Center [62]<br>Virginia Tech Child Development Lab School [35]                                                                                                                                                                                                                                                                                                                                                                                                                                                                       |
| Hosting visits in<br>university ECEC<br>centre ( <i>n</i> = 24) | Botanical Garden Room [24]<br>Child development center [31]<br>Child Development Center for Learning and Research [70]<br>Child Development Laboratory [15]<br>Child development laboratory school [59]<br>Child development laboratory school [69]<br>Child Study Centre [58]<br>Dr. Pat Feinstein Child Development Center [62]<br>Early Childhood Research Laboratory [63]<br>Experimental Greenhouse Room [24]<br>Harold E. Jones Child Study Center [61]<br>Hashemite University nursery [55]<br>Housatonic Community College Early Childhood Laboratory School [65]<br>Karen Slattery Educational Research Center for Child Development [57]<br>Kent State Child Development Center [56]<br>Kent State University Laboratory School [36]<br>Laboratory school [60]<br>Myrna's Children's Village [32]<br>South Dakota State University Laboratory School [36]<br>The SM Laboratory Preschool [71]<br>University laboratory preschool [3]<br>URI Child Development Center [62]<br>Virginia Tech Child Development Lab School [35]<br>Wildflower Valley Room [24] |

---



|                                                                           |                                                                                                                                                                                                                                                                                                                                                                                                                                                                                                                                                                                                                                                                                                                                                                                                                                                                                                           |
|---------------------------------------------------------------------------|-----------------------------------------------------------------------------------------------------------------------------------------------------------------------------------------------------------------------------------------------------------------------------------------------------------------------------------------------------------------------------------------------------------------------------------------------------------------------------------------------------------------------------------------------------------------------------------------------------------------------------------------------------------------------------------------------------------------------------------------------------------------------------------------------------------------------------------------------------------------------------------------------------------|
| Participating in collaborative meetings<br>( <i>n</i> = 21)               | Botanical Garden Room [24]<br>Child development center [31]<br>Child Development Center for Learning and Research [70]<br>Child Development Laboratory [15]<br>Child development laboratory school [59]<br>Child development laboratory school [69]<br>Child Study Centre [58]<br>Dr. Pat Feinstein Child Development Center [62]<br>Early Childhood Research Laboratory [63]<br>Harold E. Jones Child Study Center [66]<br>Kent State Child Development Center [56]<br>Kent State University Laboratory School [36]<br>Laboratory school [60]<br>Malcolm Price Laboratory School [68]<br>Myrna's Children's Village [32]<br>South Dakota State University Laboratory School [36]<br>University laboratory preschool [3]<br>URI Child Development Center [62]<br>USC/Gateway Child Development and Research Center [18]<br>Virginia Tech Child Development Lab School [35]<br>Wildflower Valley Room [24] |
| Networking and visiting in other university ECEC centres ( <i>n</i> = 10) | Child development center [31]<br>Child Development Center for Learning and Research [70]<br>Child Development Laboratory [15]<br>Early Childhood Research Laboratory [63]<br>Housatonic Community College Early Childhood Laboratory School [65]<br>Kent State Child Development Center [56]<br>Kent State University Laboratory School [36]<br>Laboratory school [60]<br>South Dakota State University Laboratory School [36]<br>Virginia Tech Child Development Lab School [35]                                                                                                                                                                                                                                                                                                                                                                                                                         |
| Training and educational activities for parents<br>( <i>n</i> = 17)       | Child development center [31]<br>Child Development Center for Learning and Research [70]<br>Child development laboratory school [59]<br>Child development laboratory school [69]<br>Child Study Centre [58]<br>Dr. Pat Feinstein Child Development Center [62]<br>Early Childhood Research Laboratory [63]<br>Experimental Greenhouse Room [24]<br>Harold E. Jones Child Study Center [61]<br>Harold E. Jones Child Study Center [66]<br>Hashemite University nursery [55]<br>Kent State Child Development Center [56]<br>Merrill-Palmer Institute, laboratory programme [43]<br>Myrna's Children's Village [32]<br>South Dakota State University Laboratory School [36]<br>University laboratory preschool [3]<br>Virginia Tech Child Development Lab School [35]                                                                                                                                        |
| In-service training for ECEC community<br>( <i>n</i> = 15)                | Child development center [31]<br>Child development laboratory school [69]<br>Child Study Centre [58]<br>Dr. Pat Feinstein Child Development Center [62]<br>Early Childhood Research Laboratory [63]<br>GMU Child Development Center [40]<br>Harold E. Jones Child Study Center [61]<br>Housatonic Community College Early Childhood Laboratory School [65]<br>Kent State Child Development Center [56]<br>Kent State University Laboratory School [36]                                                                                                                                                                                                                                                                                                                                                                                                                                                    |

---

|                                                                                                   |                                                                       |
|---------------------------------------------------------------------------------------------------|-----------------------------------------------------------------------|
|                                                                                                   | Laboratory school [60]                                                |
|                                                                                                   | Merrill-Palmer Institute, laboratory programme [43]                   |
|                                                                                                   | URI Child Development Center [62]                                     |
|                                                                                                   | USC/Gateway Child Development and Research Center [18]                |
|                                                                                                   | Wildflower Valley Room [24]                                           |
| Multidisciplinary educational collaboration with other university departments<br>( <i>n</i> = 12) | Child development center [31]                                         |
|                                                                                                   | Child Development Laboratory [15]                                     |
|                                                                                                   | Child development laboratory school [69]                              |
|                                                                                                   | Child Study Centre [58]                                               |
|                                                                                                   | Dr. Pat Feinstein Child Development Center [62]                       |
|                                                                                                   | Early Childhood Research Laboratory [63]                              |
|                                                                                                   | GMU Child Development Center [40]                                     |
|                                                                                                   | Harold E. Jones Child Study Center [61]                               |
|                                                                                                   | Karen Slattery Educational Research Center for Child Development [57] |
|                                                                                                   | Myrna's Children's Village [32]                                       |
|                                                                                                   | University laboratory preschool [3]                                   |
|                                                                                                   | URI Child Development Center [62]                                     |
| Supporting professional development of university faculty members<br>( <i>n</i> = 8)              | Botanical Garden Room [24]                                            |
|                                                                                                   | Child development center [31]                                         |
|                                                                                                   | Dr. Pat Feinstein Child Development Center [62]                       |
|                                                                                                   | Experimental Greenhouse Room [24]                                     |
|                                                                                                   | Harold E. Jones Child Study Center [61]                               |
|                                                                                                   | Hashemite University nursery [55]                                     |
|                                                                                                   | Kent State Child Development Center [56]                              |
|                                                                                                   | URI Child Development Center [62]                                     |
| Representing in variety of committees or boards<br>( <i>n</i> = 14)                               | Child development center [31]                                         |
|                                                                                                   | Child Development Center for Learning and Research [70]               |
|                                                                                                   | Child Development Laboratory [15]                                     |
|                                                                                                   | Child development laboratory school [59]                              |
|                                                                                                   | Child development laboratory school [69]                              |
|                                                                                                   | Child Study Centre [58]                                               |
|                                                                                                   | Dr. Pat Feinstein Child Development Center [62]                       |
|                                                                                                   | GMU Child Development Center [40]                                     |
|                                                                                                   | Harriett Laboratory School [67]                                       |
|                                                                                                   | Kent State Child Development Center [56]                              |
|                                                                                                   | Malcolm Price Laboratory School [68]                                  |
|                                                                                                   | Myrna's Children's Village [32]                                       |
|                                                                                                   | The campus laboratory school child development center [23]            |
|                                                                                                   | URI Child Development Center [62]                                     |
| Consulting ECEC community<br>( <i>n</i> = 10)                                                     | Child Development Laboratory [15]                                     |
|                                                                                                   | Child development laboratory school [59]                              |
|                                                                                                   | Child development laboratory school [69]                              |
|                                                                                                   | Child Study Centre [58]                                               |
|                                                                                                   | Harold E. Jones Child Study Center [61]                               |
|                                                                                                   | Harriett Laboratory School [67]                                       |
|                                                                                                   | Kent State University Laboratory School [36]                          |
|                                                                                                   | South Dakota State University Laboratory School [36]                  |
|                                                                                                   | URI Child Development Center [62]                                     |
|                                                                                                   | Virginia Tech Child Development Lab School [35]                       |
| Conducting collaborative project with partners<br>( <i>n</i> = 7)                                 | Child development center [31]                                         |
|                                                                                                   | Child Development Center for Learning and Research [70]               |
|                                                                                                   | Dr. Pat Feinstein Child Development Center [62]                       |
|                                                                                                   | GMU Child Development Center [40]                                     |
|                                                                                                   | Hashemite University Nursery [55]                                     |
|                                                                                                   | Housatonic Community College Early Childhood Laboratory School [65]   |
|                                                                                                   | URI Child Development Center [62]                                     |

---

---

|                                                                           |                                                                                                                                                                                                                                                                                                                                                                                                                   |
|---------------------------------------------------------------------------|-------------------------------------------------------------------------------------------------------------------------------------------------------------------------------------------------------------------------------------------------------------------------------------------------------------------------------------------------------------------------------------------------------------------|
| Contributions to<br>the organisation<br>of conferences<br>( <i>n</i> = 6) | Child Development Center for Learning and Research [70]<br>Child development laboratory school [69]<br>Child Study Centre [57]<br>Dr. Pat Feinstein Child Development Center [62]<br>Malcolm Price Laboratory School [68]<br>URI Child Development Center [62]                                                                                                                                                    |
| Carrying out<br>fundraising<br>efforts<br>( <i>n</i> = 9)                 | Child development center [31]<br>Child Development Center for Learning and Research [70]<br>Child development laboratory school [69]<br>Dr. Pat Feinstein Child Development Center [62]<br>Early Childhood Research Laboratory [63]<br>Malcolm Price Laboratory School [68]<br>University laboratory preschool [3]<br>URI Child Development Center [62]<br>USC/Gateway Child Development and Research Center [18] |

---
